# Supplementary material for: Designed hierarchical synthesis of ring-shaped Bi2WO6@CeO2 hybrid nanoparticle aggregates for photocatalytic detoxification of cyanide
Source: Royal Society of Chemistry journal article supplement (doi:10.1039/c4gc00065j), 2014-01-01
Supplement: c4gc00065j1.pdf [file c4gc00065j1.pdf]

# Electronic Supplementary Information

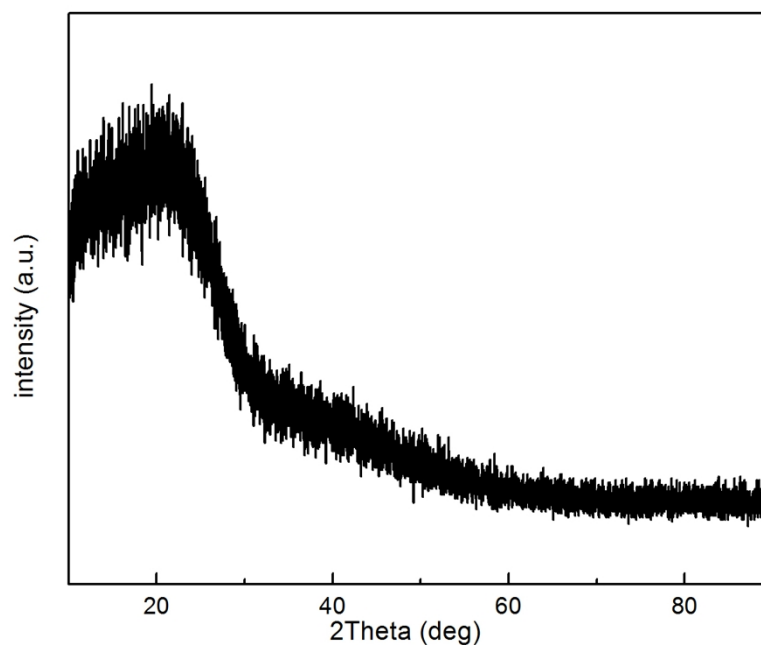

**Fig. S1** XRD of the resulting graphitize carbon after composites of  $\text{HNO}_3$  and  $\text{H}_2\text{O}_2$  were hired to 5 remove the  $\text{Bi}_2\text{WO}_6@\text{CeO}_2$ .

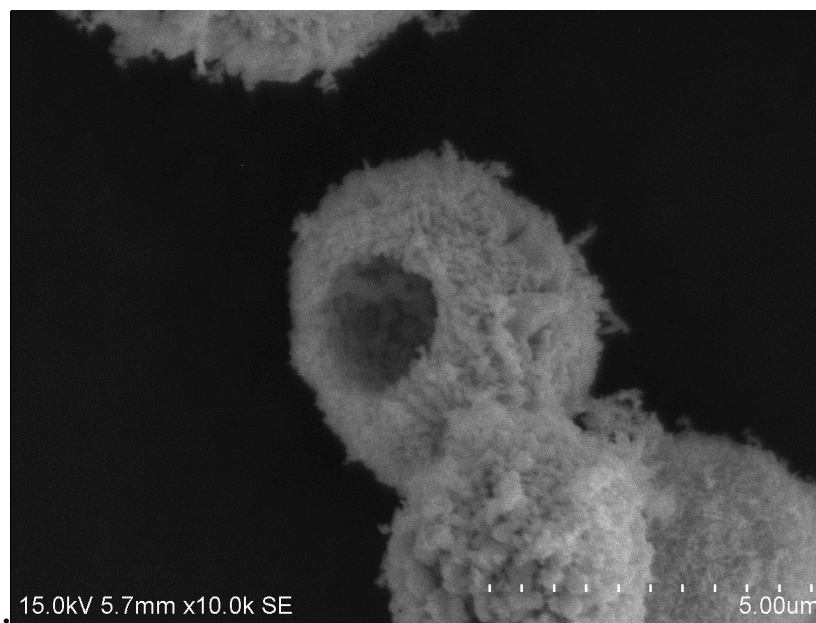

**Fig. S2** SEM image of the resulting graphitized carbon after composites of  $\text{HNO}_3$  and  $\text{H}_2\text{O}_2$  were hired to remove the  $\text{Bi}_2\text{WO}_6@\text{CeO}_2$ .
